# Supplementary figures and images for: The Effect of Financial Scarcity on Reinforcer Pathology: A Dyadic Developmental Examination
Source: MDPI journal article supplement (doi:10.3390/children9091338), 2022-09-01

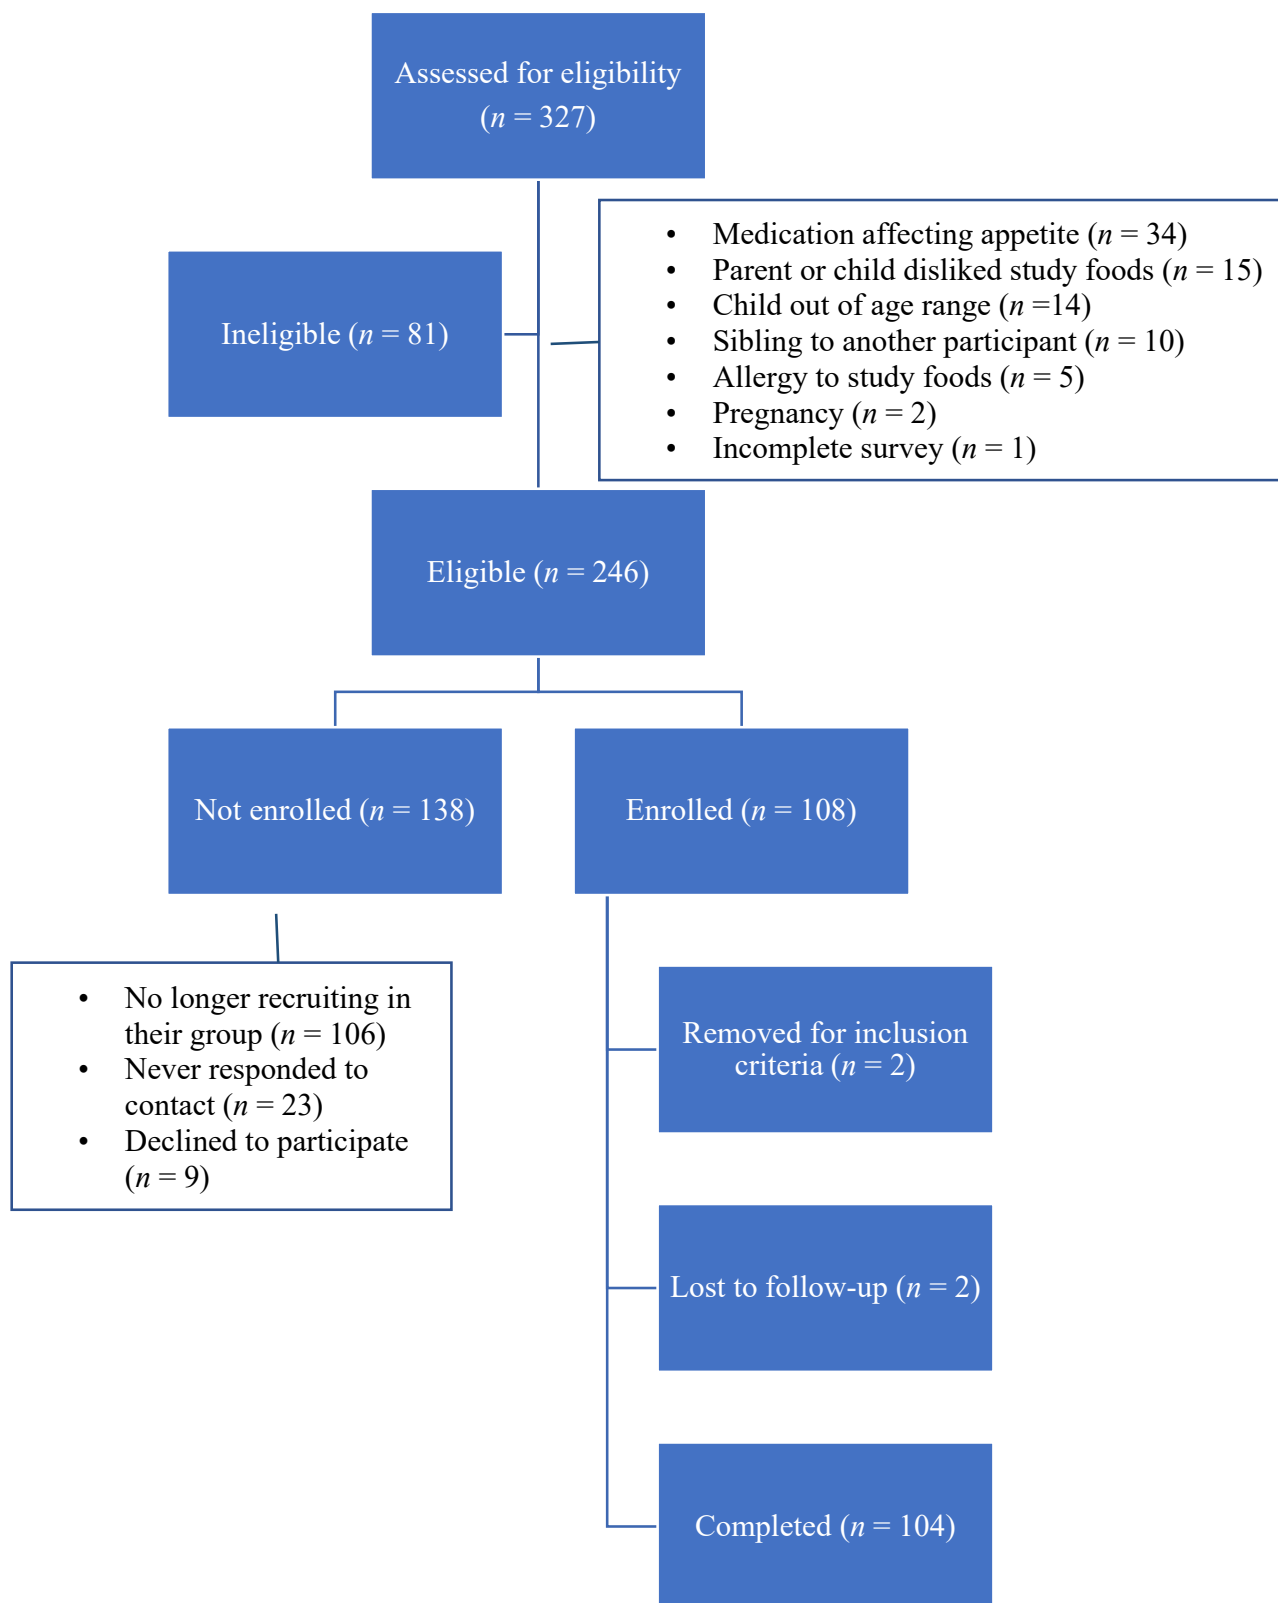

**Figure S1.** CONSORT diagram.

Supplement: s1 [file s1]
